# Supplementary material for: Phytotoxic Effects of Polystyrene and Polymethyl Methacrylate Microplastics on Allium cepa Roots
Source: MDPI journal article supplement (doi:10.3390/plants12040747), 2023-02-07
Supplement: s1 [file s1]

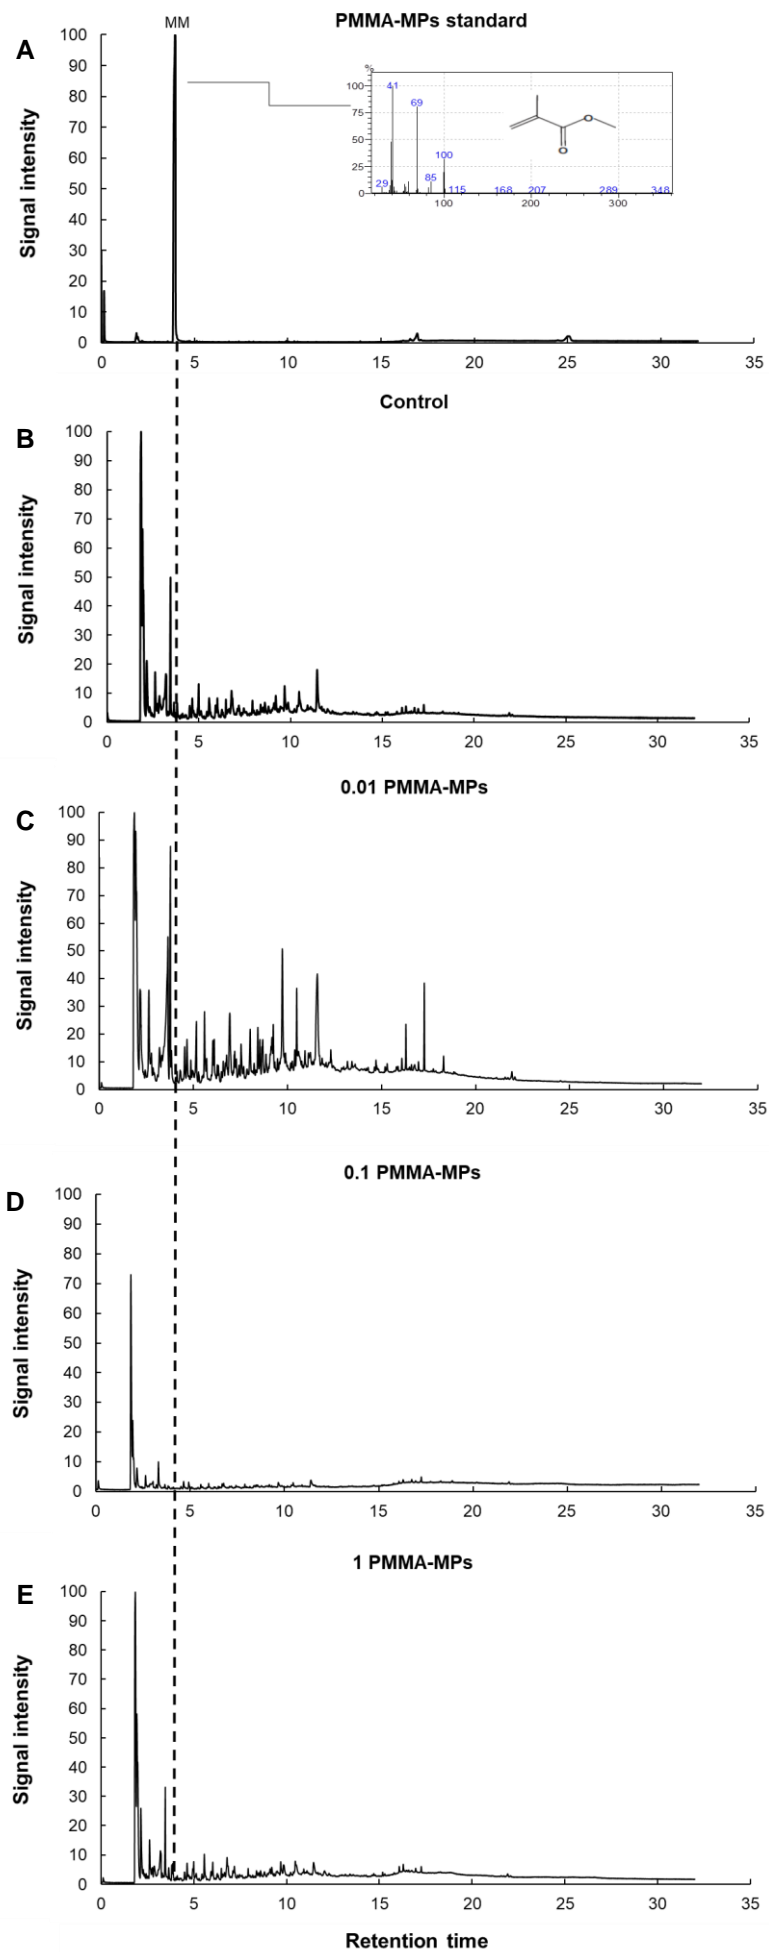

**Supplemental Figure S2.** Ion chromatogram of methyl methacrylate (MM) from pyrolysis GC-MS with characteristic  $m/z$  values. A) standard sample of PMMA-MPs; B) Control (untreated *Allium cepa* roots); *A. cepa* roots treated with C) 0.01 g L<sup>-1</sup> PMMA-MPs; D) 0.1 g L<sup>-1</sup> PMMA-MPs; and E) 1 g L<sup>-1</sup> PMMA-MPs.
